# Supplementary material for: TatB Functions as an Oligomeric Binding Site for Folded Tat Precursor Proteins
Source: PubMed Central journal article supplement — Mol Biol Cell. 2010 Dec 1;21(23):4151–61. doi: 10.1091/mbc.E10-07-0585 (PMC2993744; doi:10.1091/mbc.e10-07-0585), 2010-12-01
Supplement: E10-07-0585_1.pdf [file E10-07-0585_1.pdf]

| <b>pKSMSufl<br/>amber<br/>mutant</b> | <b>Primer 1<br/>(5'→3')</b>                                     | <b>Primer 2<br/>(5'→3')</b>                                     |
|--------------------------------------|-----------------------------------------------------------------|-----------------------------------------------------------------|
| F22Bpa                               | C CGT GGG CAA CCG CTG <u>TAG</u> ATG ACT<br>GTA CAA CGT GC      | GC ACG TTG TAC AGT CAT <u>CTA</u> CAG<br>CGG TTG CCC ACG G      |
| F167Bpa                              | ATC CAG GAT AAA CGG CTG GAT AAC<br><u>TAG</u> GGT ACG CCA GAA T | A TTC TGG CGT ACC <u>CTA</u> GTT ATC CAG<br>CCG TTT ATC CTG GAT |
| L301Bpa                              | CTG CGC CCA ACC GGC <u>TAG</u> CTG CCG<br>CTG GTC ACA           | TGT GAC CAG CGG CAG <u>CTA</u> GCC GGT<br>TGG GCG CAG           |
| M311Bpa                              | C ACA GAC AGT CTT CCG <u>TAG</u> CGC TTG<br>CTG CCA ACT         | AGT TGG CAG CAA GCG <u>CTA</u> CGG AAG<br>ACT GTC TGT G         |
| L341Bpa                              | CCG GGT ATT AAT GGA CAG <u>TAG</u> TGG<br>GAC GTC AAC CGT AT    | AT ACG GTT GAC GTC CCA <u>CTA</u> CTG<br>TCC ATT AAT ACC CGG    |
| W414Bpa                              | TT TAT TTC GGT CAG CCT TCC <u>TAG</u> GCG<br>CAC TTC C          | G GAA GTG CGC <u>CTA</u> GGA AGG CTG ACC<br>GAA ATA AA          |
| W113pBpa                             | G AAC GCA GCT ACT CTG <u>TAG</u> TAT CAC<br>GCC AAT ACT C       | G AGT ATT GGC GTG ATA <u>CTA</u> CAG AGT<br>AGC TGC GTT C       |
| W134Bpa                              | C GGC CTT GCC GGA ATG <u>TAG</u> CTG GTG<br>GA                  | TC CAC CAG <u>CTA</u> CAT TCC GGC AAG<br>GCC G                  |
| L206Bpa                              | C TGG GTG CGC TTG CGA <u>TAG</u> CTG AAC<br>GCG TCG             | CGA CGC GTT CAG <u>CTA</u> TCG CAA GCG<br>CAC CCA G             |
| F234Bpa                              | G ATT TCT GGC GAT CAG GGA <u>TAG</u> CTG<br>CCT GCT CC          | GG AGC AGG CAG <u>CTA</u> TCC CTG ATC<br>GCC AGA AAT C          |

| <b>pET28aTorA-PhoA<br/>amber mutant</b> | <b>Primer 1<br/>(5'→3')</b>                                                    | <b>Primer 2<br/>(5'→3')</b>                                                    |
|-----------------------------------------|--------------------------------------------------------------------------------|--------------------------------------------------------------------------------|
| I124Bpa                                 | GCG CTG GGC GTC GAT <u>TAG</u> CAC<br>GAA AAA GAT CAC                          | GTG ATC TTT TTC GTG <u>CTA</u> ATC<br>GAC GCC CAG CGC                          |
| W220Bpa                                 | GCA ACC GCC GGT GAA <u>TAG</u> CAG<br>GGA AAA ACG CTG                          | CAG CGT TTT TCC CTG <u>CTA</u> TTC<br>ACC GGC GGT TGC                          |
| I279Bpa                                 | ACG TAC CAC GGC AAT <u>TAG</u> GAC<br>AAG CCC GCA GTT ACC                      | GGT AAC TGC GGG CTT GTC <u>CTA</u><br>ATT GCC GTG GTA CGT                      |
| L417Bpa                                 | CAT ACC GGT AGT CAG <u>TAG</u> CGT<br>ATT GCG GCG TAT                          | ATA CGC CGC AAT ACG <u>CTA</u> CTG<br>ACT ACC GGT ATG                          |
| I99Bpa                                  | CCT GCA AAA AAT ATT ATT TTG<br>CTG <u>TAG</u> GGC GAT GGG ATG GGG<br>GAT TCG G | C CGA ATC CCC CAT CCC ATC GCC<br><u>CTA</u> CAG CAA AAT AAT ATT TTT<br>TGC AGG |
| V196                                    | GGT CTG GCG ACC GGT AAC <u>TAG</u><br>TCT ACC GCA GAG TTG CAG                  | CTG CAA CTC TGC GGT AGA <u>CTA</u><br>GTT ACC GGT CGC CAG ACC                  |

| <b>p8737-TatB<br/>amber mutant</b> | <b>Primer 1<br/>(5'→3')</b>                                           | <b>Primer 2<br/>(5'→3')</b>                                           |
|------------------------------------|-----------------------------------------------------------------------|-----------------------------------------------------------------------|
| L9Bpa                              | ATC GGT TTT AGC GAA <u>TAG</u> CTA TTG GTG<br>TTC ATC ATC GGC CTC     | GAG GCC GAT GAT GAA CAC CAA TAG<br><u>CTA</u> TTC GCT AAA ACC GAT     |
| L10Bpa                             | GAT ATC GGT TTT AGC GAA CTG <u>TAG</u> TTG<br>GTG TTC ATC ATC GGC CTC | GAG GCC GAT GAT GAA CAC CAA <u>CTA</u><br>CAG TTC GCT AAA ACC GAT ATC |
| L11Bpa                             | C GGT TTT AGC GAA CTG CTA <u>TAG</u> GTG<br>TTC ATC ATC GG            | CC GAT GAT GAA CAC <u>CTA</u> TAG CAG TTC<br>GCT AAA ACC G            |
| G34Bpa                             | CG GTA AAA ACG GTA GCG <u>TAG</u> TGG ATT<br>CGC GCG TTG CG           | CG CAA CGC GCG AAT CCA <u>CTA</u> CGC TAC<br>CGT TTT TAC CG           |
| W35Bpa                             | ACG GTA GCG GGC <u>TAG</u> ATT CGC GCG TTG                            | CAA CGC GCG AAT <u>CTA</u> GCC CGC TAC CGT                            |
| I36Bpa                             | ACG GTA GCG GGC TGG <u>TAG</u> CGC GCG<br>TTG CGT TCA                 | TGA ACG CAA CGC GCG <u>CTA</u> CCA GCC<br>CGC TAC CGT                 |
| L54Bpa                             | AAC GAA CTG ACC CAG GAG <u>TAG</u> AAA<br>CTC CAG GAG TTT CAG G       | CTG AAA CTC CTG GAG TTT <u>CTA</u> CTC CTG<br>GGT CAG TTC GTT         |

|        |                                                                       |                                                                       |
|--------|-----------------------------------------------------------------------|-----------------------------------------------------------------------|
| L56Bpa | GAA CTG ACC CAG GAG TTA AAA <u>TAG</u><br>CAG GAG TTT CAG GAC AGT CTG | CAG ACT GTC CTG AAA CTC CTG <u>CTA</u> TTT<br>TAA CTC CTG GGT CAG TTC |
| L78Bpa | CT AAC CTG ACG CCC GAA <u>TAG</u> AAA GCG<br>TCG ATG GAT G            | C ATC CAT CGA CGC TTT <u>CTA</u> TTC GGG<br>CGT CAG GTT AG            |

| <b>pKSMSufI ΔSP</b> | <b>Primer 1<br/>(5'→3')</b>                       | <b>Primer 2<br/>(5'→3')</b>                       |
|---------------------|---------------------------------------------------|---------------------------------------------------|
| SufI A27L           | CCC CTG AAG GCC AGC <u>CTA</u> GCC<br>GGG CAA CAG | CTG TTG CCC GGC <u>TAG</u> GCT GGC<br>CTT CAG GGG |
| SufI S26L&A27L      | CCC CTG AAG GCC <u>CTC</u> CTA GCC<br>GGG CAA CAG | CTG TTG CCC GGC TAG <u>GAG</u> GGC<br>CTT CAG GGG |
| SufI S26L&A27L&Q30L | CCC CTG AAG GCC <u>CTC</u> CTA GCC<br>GGG CTA CAG | CTG TAG CCC GGC TAG <u>GAG</u> GGC<br>CTT CAG GGG |

## Transport activity of *tatB* amber mutant vesicles

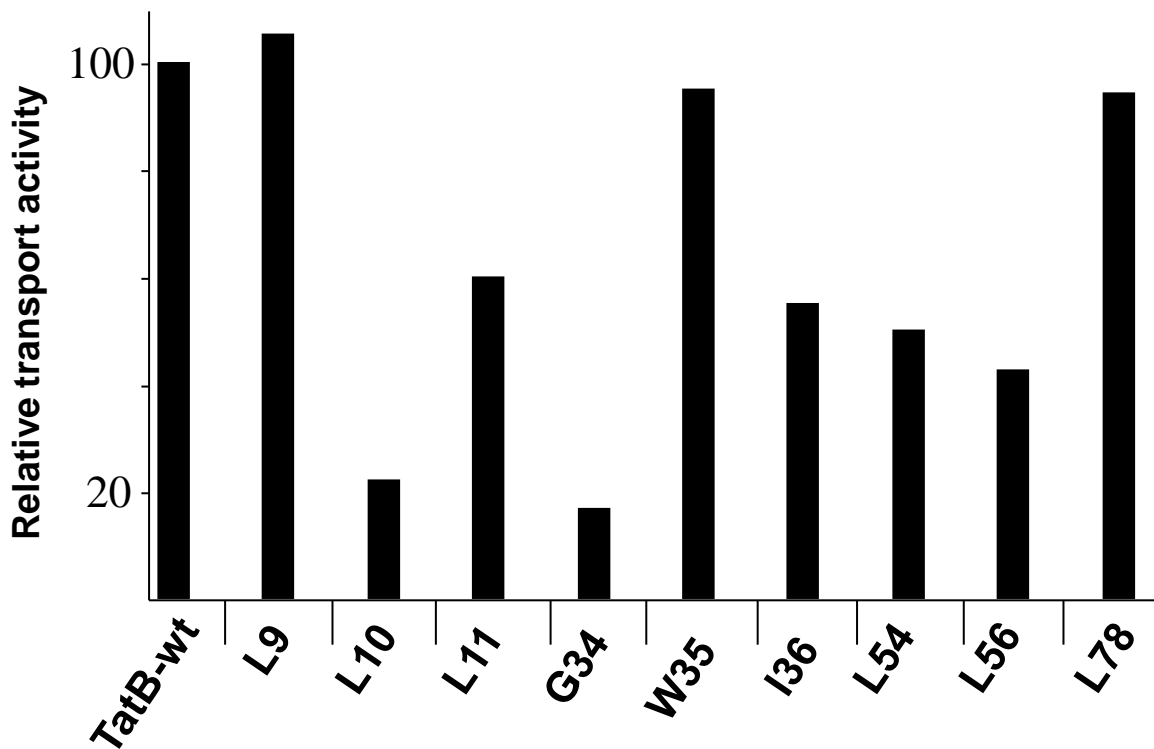

pSufI was synthesized in the presence of one of the indicated membrane vesicles. INVs were reisolated and then incubated in the presence of an ATP-regenerating system. The amount of PK-protected pSufI and SufI was determined, the translocation efficiency quantified and normalized with respect to that of wt-INVs (for further details, see Materials and Methods).
